# Supplementary material for: Preclinical Evaluation of a Food-Derived Functional Ingredient to Address Skeletal Muscle Atrophy
Source: PubMed Central journal article supplement (PMC7469066; doi:10.3390/nu12082274), 2020-07-29
Supplement: nutrients-12-02274-s001.pdf [file nutrients-12-02274-s001.pdf]

## Supplemental Data

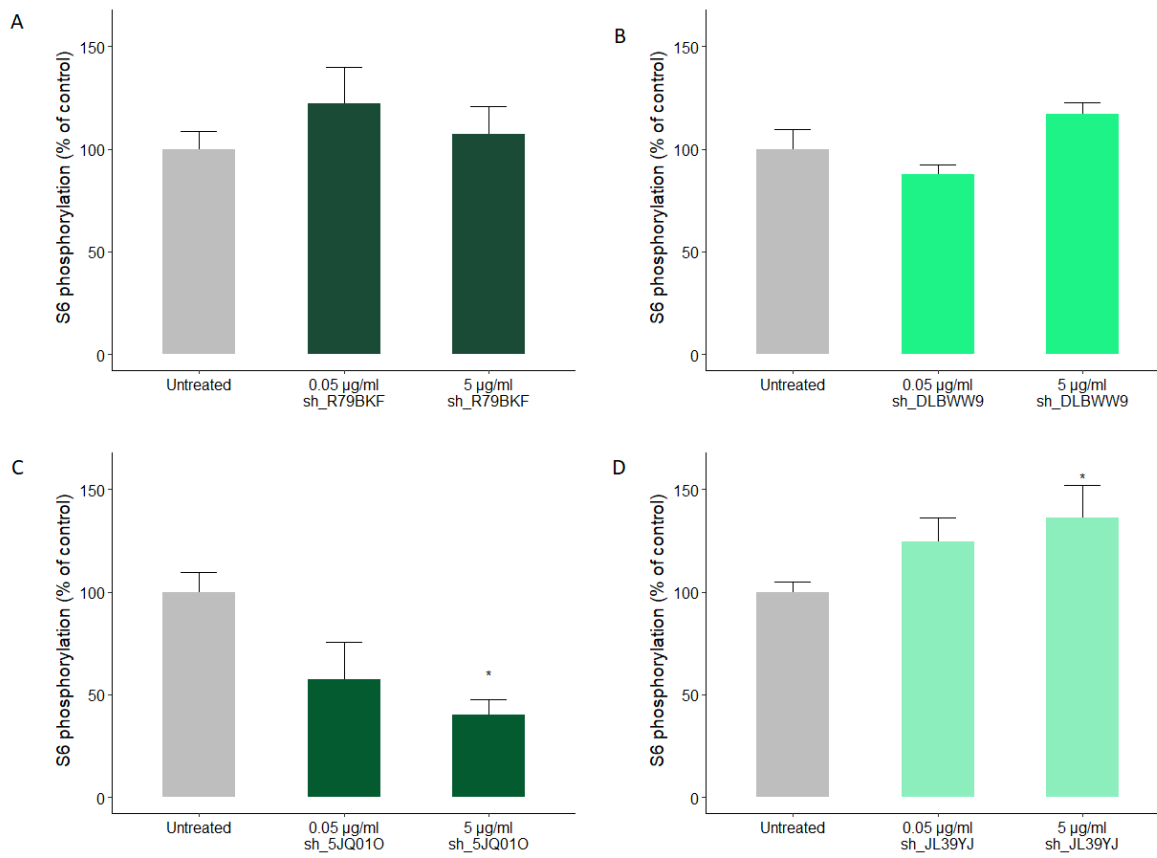

**Figure S1.** Effect of alternative food-derived hydrolysate treatment on S6 phosphorylation. C2C12 cells were treated with (a) sh\_R79BKF (N=3), (b) sh\_DLBWW9 (N=1), (c) sh5JQ010 (N=3) or (d) sh\_JL39YJ (N=1; 0.5  $\mu\text{g/ml}$  and 5  $\mu\text{g/ml}$ ) for 30 mins following a starvation protocol and compared to untreated cells. (One-way ANOVA analysis; \* $p < 0.05$  \*\* $p < 0.01$  \*\*\* $p < 0.001$ ).

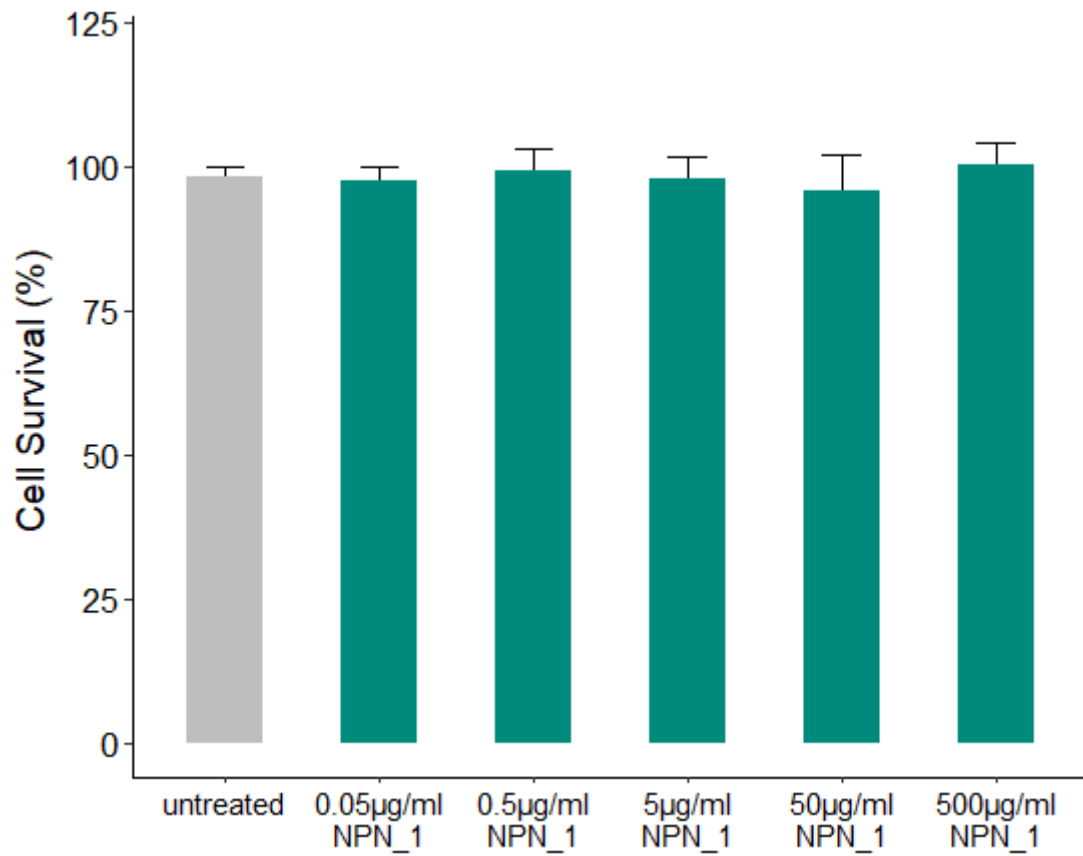

**Figure S2.** MTT assay on C2C12 cells treated NPN\_1. Percentage viability of C2C12 cells following 24 h incubation with increasing concentrations of NPN\_1. Data presented are the mean  $\pm$  SEM of at least 2 independent experiments carried out in triplicate. (\* $p < 0.05$  \*\* $p < 0.01$  \*\*\* $p < 0.001$ ).
